# Supplementary material for: Mapping the substrate specificity of the Plasmodium M1 and M17 aminopeptidases
Source: Oxford University Press journal article supplement (doi:10.1042/bcj20210172), 2021-06-16
Supplement: bcj-2021-0172_supp.pdf [file bcj-2021-0172_supp.pdf]

**SUPPLEMENTARY MATERIAL**





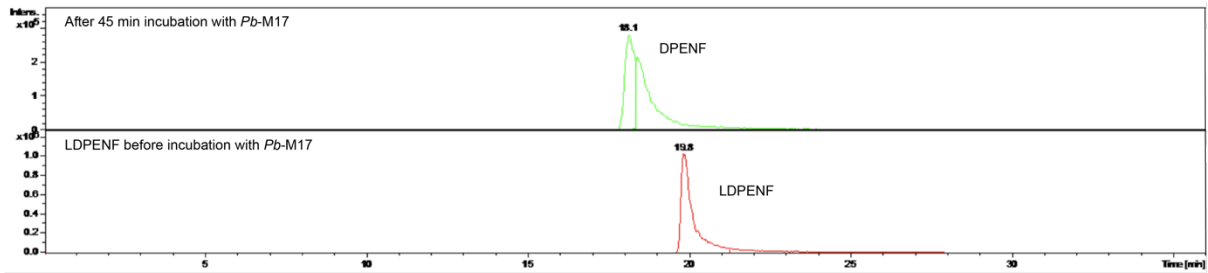

Spectrum for peak observed in green trace, after incubation with *Pb*-M17

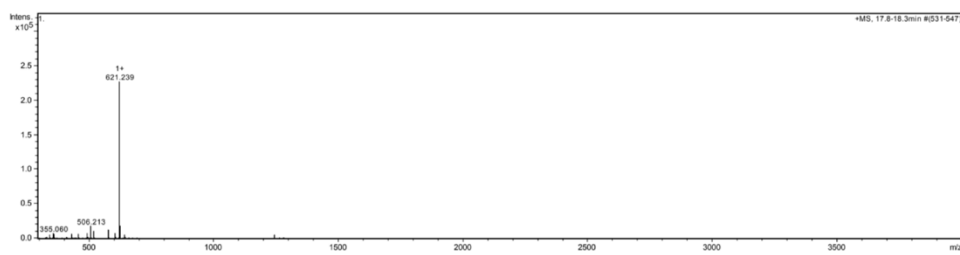

**Supplementary Figure S3. Representative mass spectrometry trace of LDPENF digestion by *Pb*-M17.** After 45 min of incubation, only one product at a molecular weight of 621 Da is observed. This correlated to the removal of the single amino acid residue Leu from the N-terminus of hexapeptide LDPENF, producing pentapeptide DPENF. Trace is representative of cleavage results obtained for each aminopeptidase – in each experiment only peptides of molecular weights 734 Da (LDPENF) and 621 Da (DPENF) were observed.

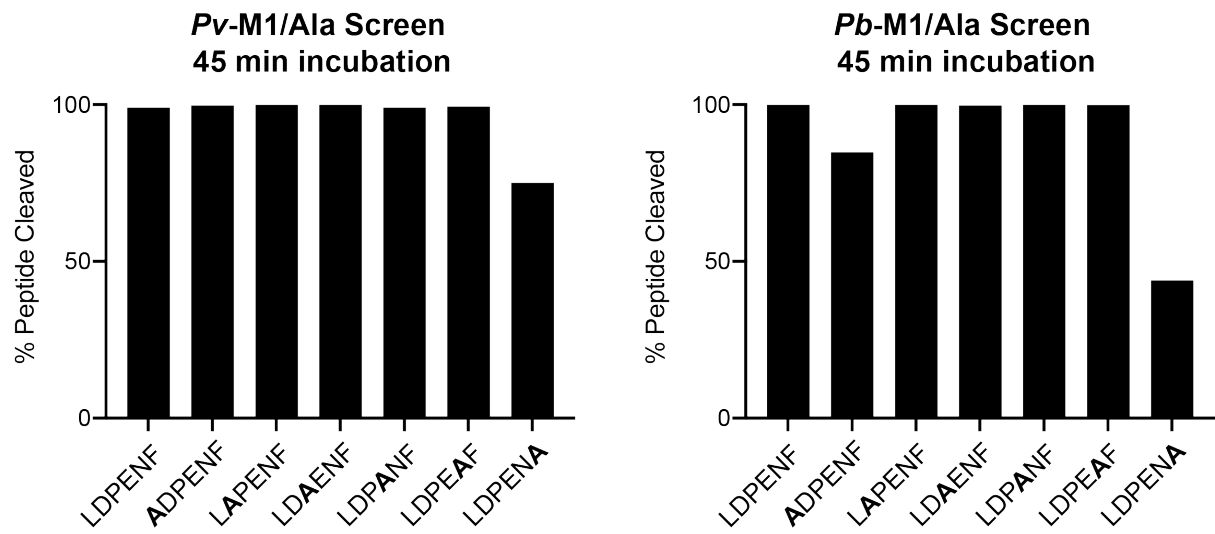

**Supplementary Figure S4. Digestion of Ala screen peptides by *Pv*-M1 and *Pb*-M1 in 45-min incubation period.** Template hexapeptide (LDPENF) and Ala screen peptides were digested to almost 100% in the 45-min incubation period at 37°C. *Pv*-M1 and *Pb*-M1 showed decreased activity levels against peptides ADPENF and LDPENA.

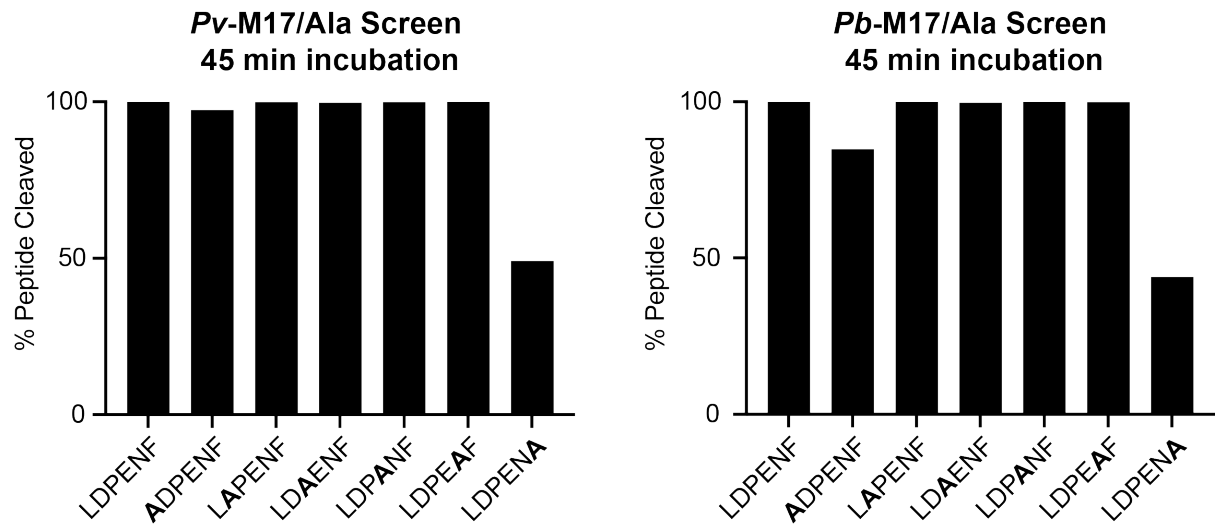

**Supplementary Figure S5. Digestion of Ala screen peptides by *Pv*-M17 and *Pb*-M17 in 45-min incubation period.** Template hexapeptide (LDPENF) and Ala screen peptides were digested to almost 100% in the 45-min incubation period at 37°C. *Pv*-M17 and *Pb*-M17 showed decreased activity levels against peptides ADPENF and LDPENA compared to LDPENF.

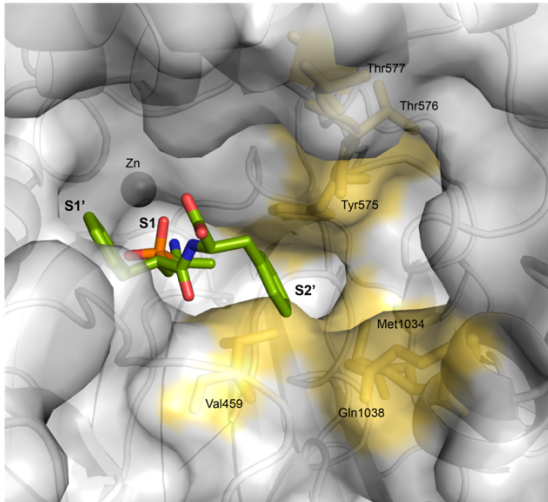

**Supplementary Figure S6. APN inhibitor PL250 docked into *PfA*-M1 X-ray crystal structure with P2' subsite highlighted.**

*E. coli* APN X-ray crystal structure in complex with PL250 (PDB ID: 2ZXG) used to dock PL250 (green sticks) into *PfA*-M1 X-ray crystal structure (PDB ID: 3EBG). S1, S1' and S2' pockets labelled. Residues postulated
